# Supplementary material for: Interface-modified NiMgO x layers with dibenzocarbazole molecules for high-efficiency perovskite light-emitting diodes
Source: Royal Society of Chemistry journal article supplement (doi:10.1039/d5mh01949d), 2025-11-25
Supplement: d5mh01949d1.pdf [file d5mh01949d1.pdf]

Supporting information

**Interface-modified NiMgO<sub>x</sub> Layers with Dibenzocarbazole Molecules for  
High-Efficiency Perovskite Light-Emitting Diodes**

*Hyungdoh Lee, Jun-Seo Lee, Seungmin Shin, Wonjeong Yu, In Hye Kwak, Hyung Joong Yun,  
Seungbum Hong, and Himchan Cho\**

12

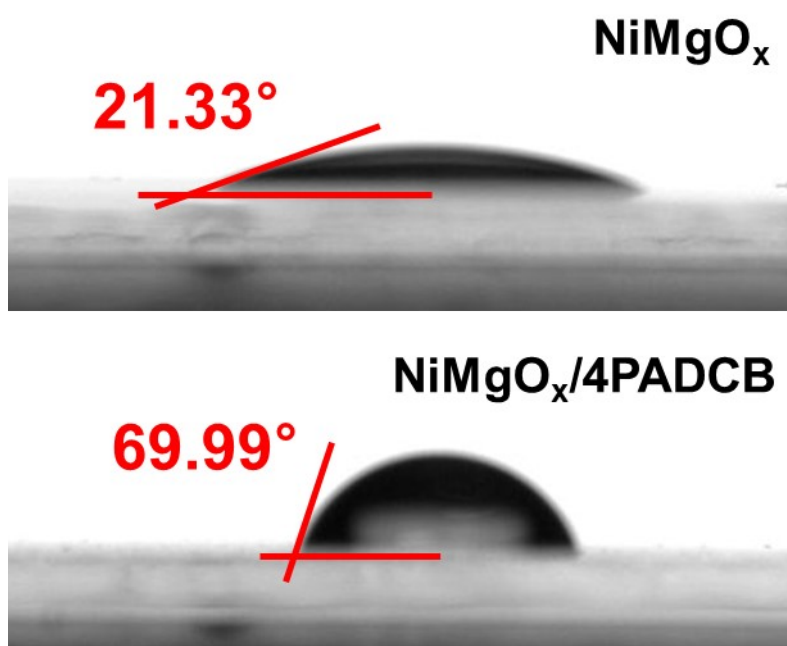

13

14

15 **Figure S1.** Water contact angle of NiMgO<sub>x</sub> surface with and without 4PADCB interlayers.

16

17

18

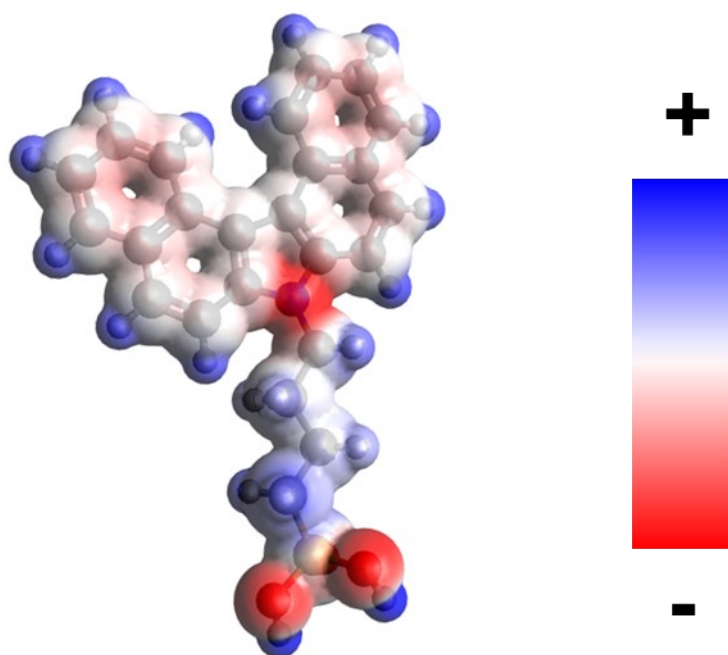

19

20

21 **Figure S2.** Electrostatic potential (ESP) mapping image of 4PADCB molecule.

22

23

24

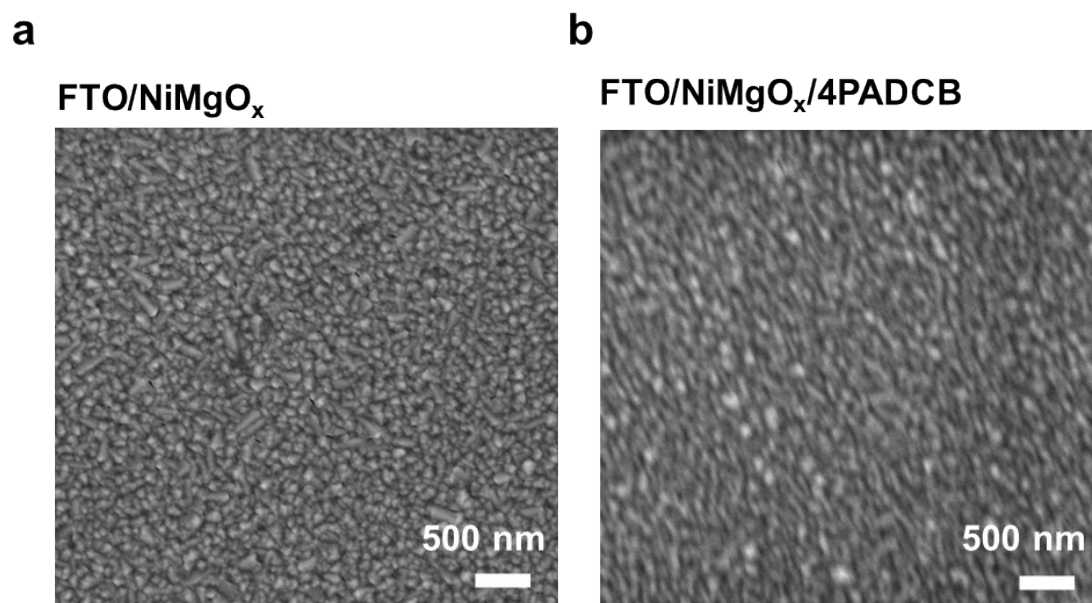

25

26

27 **Figure S3.** Scanning electron microscopy (SEM) image of (a) FTO/NiMgO<sub>x</sub> and (b)  
28 FTO/NiMgO<sub>x</sub>/4PADCB surface.

29

30

31

32

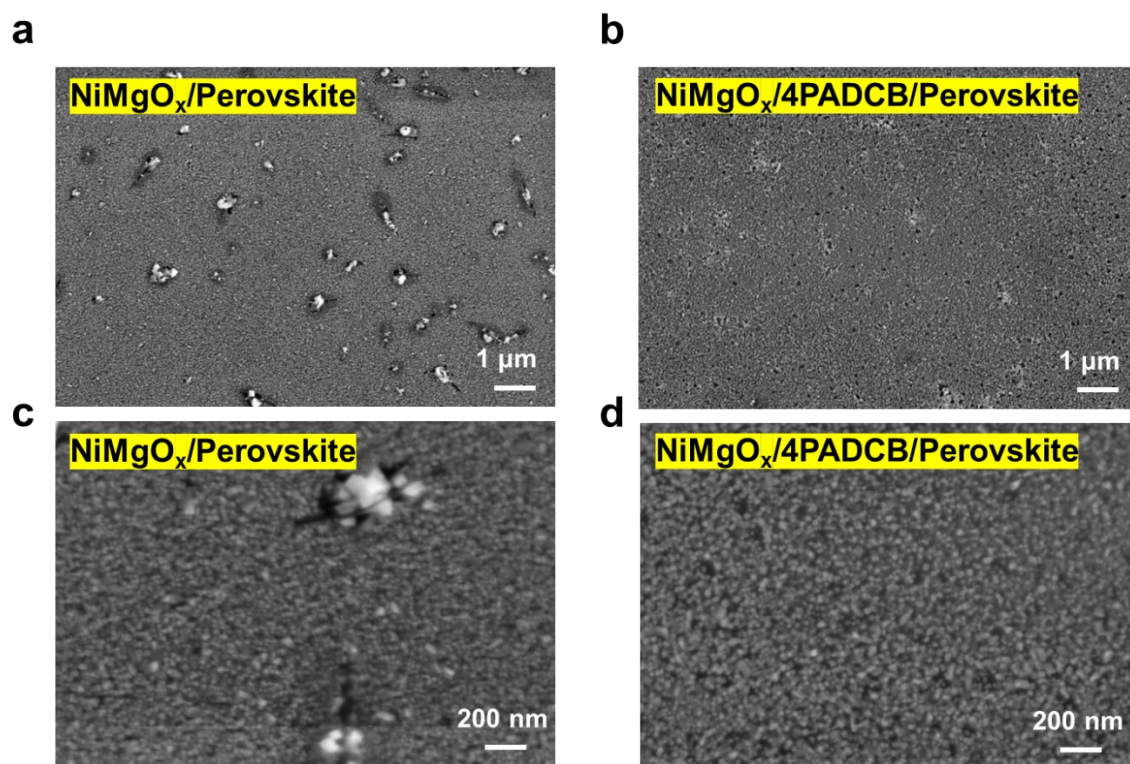

33

34

35 **Figure S4.** Surface morphology analysis of perovskite films deposited on different underlying  
36 layers. a) Scanning Electron Microscopy (SEM) image of the perovskite film surface on the  
37 pristine NiMgO<sub>x</sub> substrate and b) on the NiMgO<sub>x</sub>/4PADCB surfaces. c) High-magnification  
38 SEM image of the perovskite surface on NiMgO<sub>x</sub> and d) on NiMgO<sub>x</sub>/4PADCB.

39

40

41

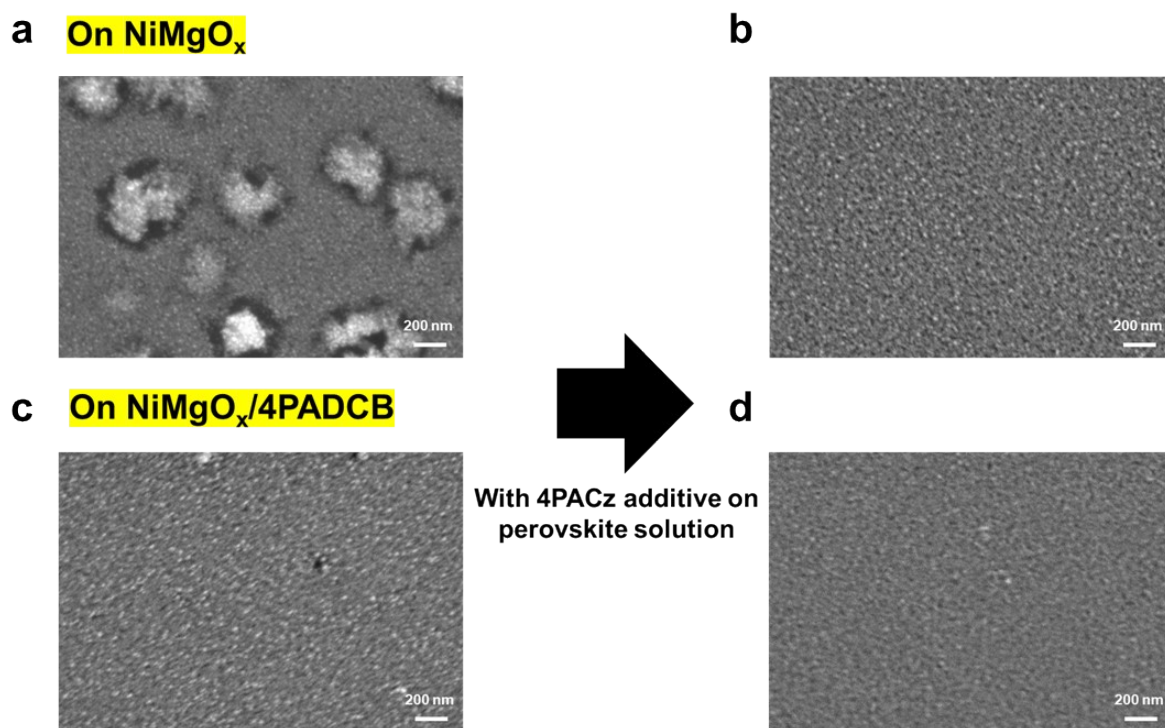

42

43

44 **Figure S5.** SEM analysis of perovskite film morphology showing films fabricated a,c) without  
 45 and b,d) with the 4PACz additive in perovskite precursor solution, comparing deposition on  
 46 a,b) the pristine  $\text{NiMgO}_x$  and c,d) the  $\text{NiMgO}_x/4\text{PADCBC}$  surfaces.

47

48

49

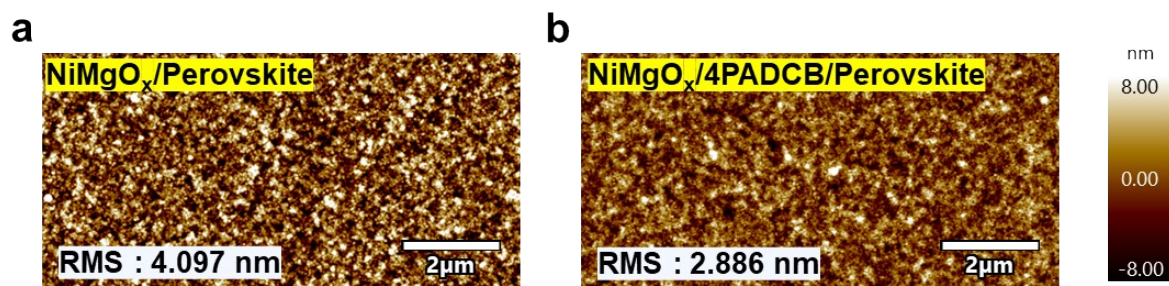

**Figure S6.** Surface topography analysis of perovskite films via Atomic Force Microscopy (AFM). a) AFM image and corresponding surface roughness data for the perovskite film deposited on the pristine NiMgO<sub>x</sub> layer and b) on the NiMgO<sub>x</sub>/4PADCB interface.

58

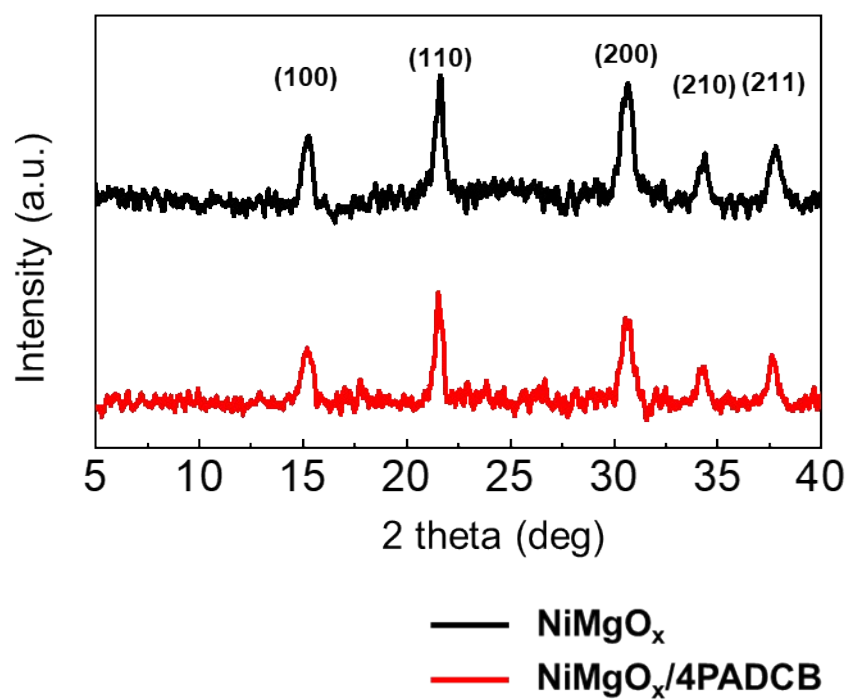

59

60

61 **Figure S7.** XRD spectra of perovskite on  $\text{NiMgO}_x$  and  $\text{NiMgO}_x/4\text{PADCB}$  layers.

62

63



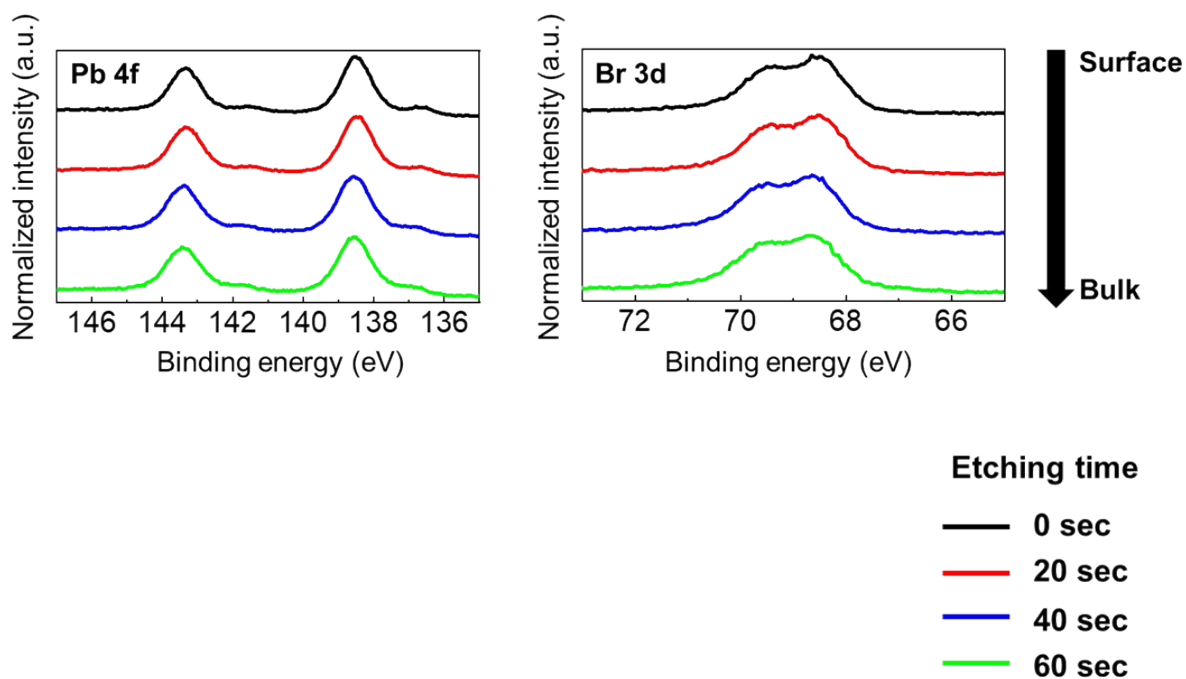

**Figure S8.** XPS depth profile analysis showing the evolution of the Pb 4f and Br 3d core-level spectra with etching time on NiMgO<sub>x</sub>/4PADCB surface.

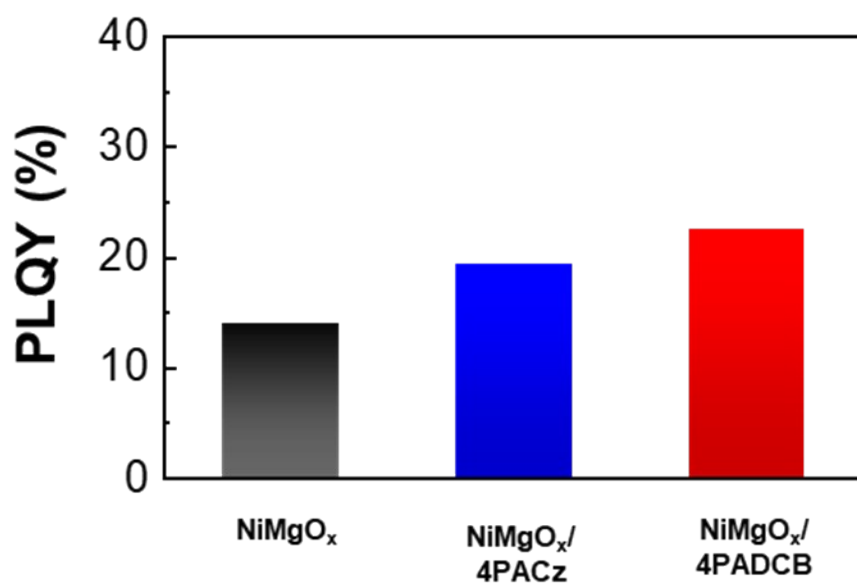

**Figure S9.** Photoluminescence quantum yield (PLQY) of perovskite on NiMgO<sub>x</sub> with and without SAM interlayers.

78

**a**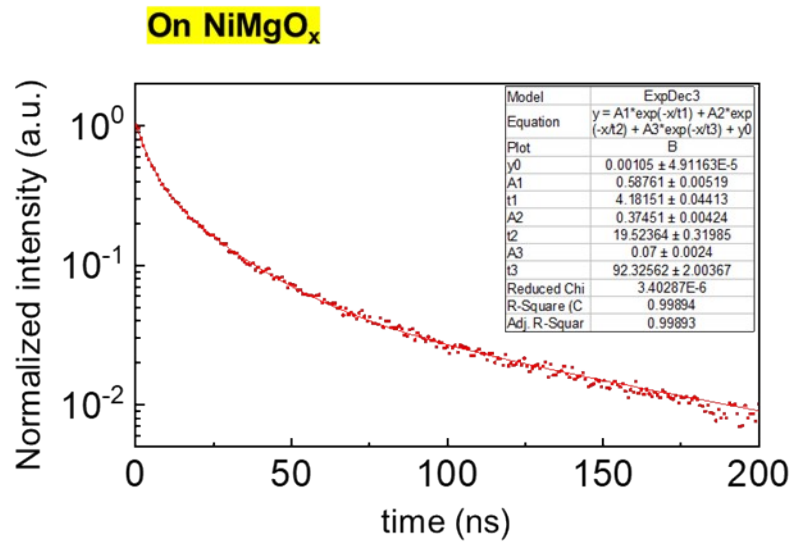**b**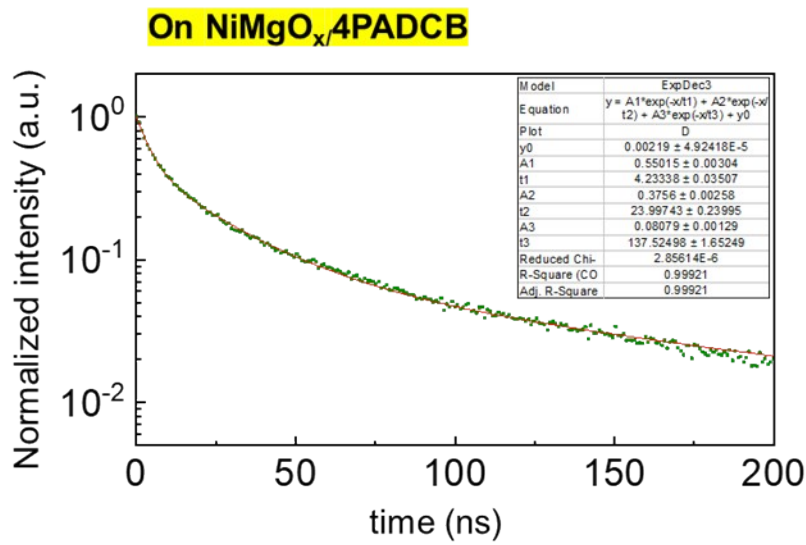

79

80

**Figure S10.** TrPL fitting data using a tri-exponential decay method. The fitting sample is perovskite on (a) NiMgO<sub>x</sub>, and (b) NiMgO<sub>x</sub>/4PADCB layers.

83

84

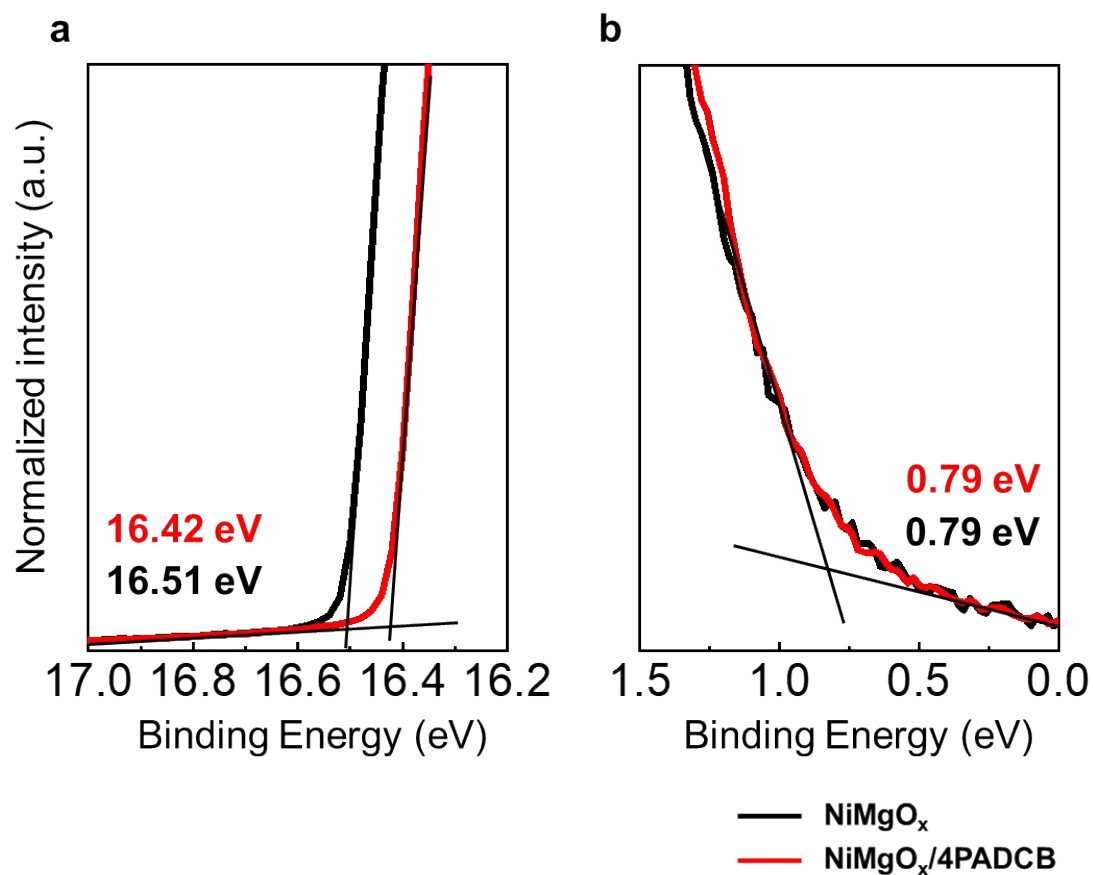

**Figure S11.** UPS spectra of perovskite on NiMgO<sub>x</sub> and NiMgO<sub>x</sub>/4PADCB layers. (a) Secondary cut-off and (b) edge regions of spectra.

92

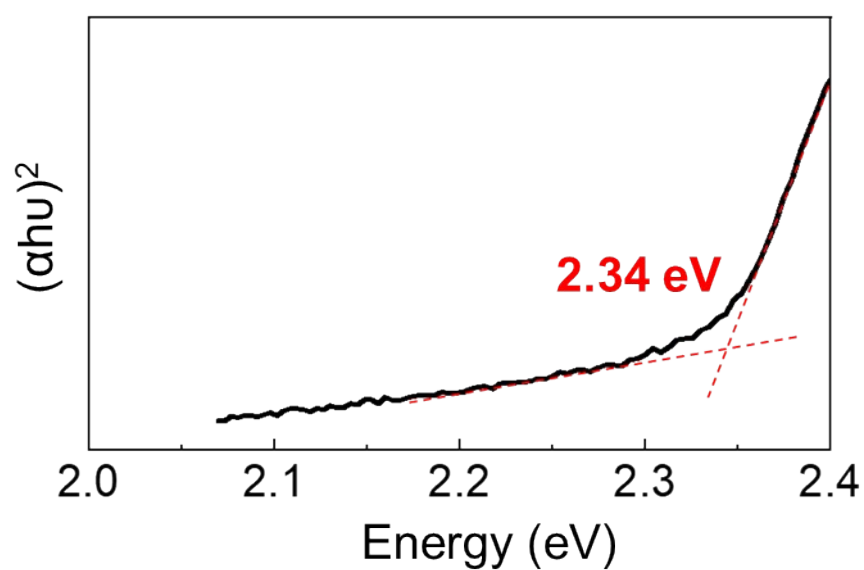

93

94

95 **Figure S12.** Tauc plot of the perovskite layers, showing an optical bandgap of 2.34 eV,  
96 consistent with the green emission region.

97

98

99

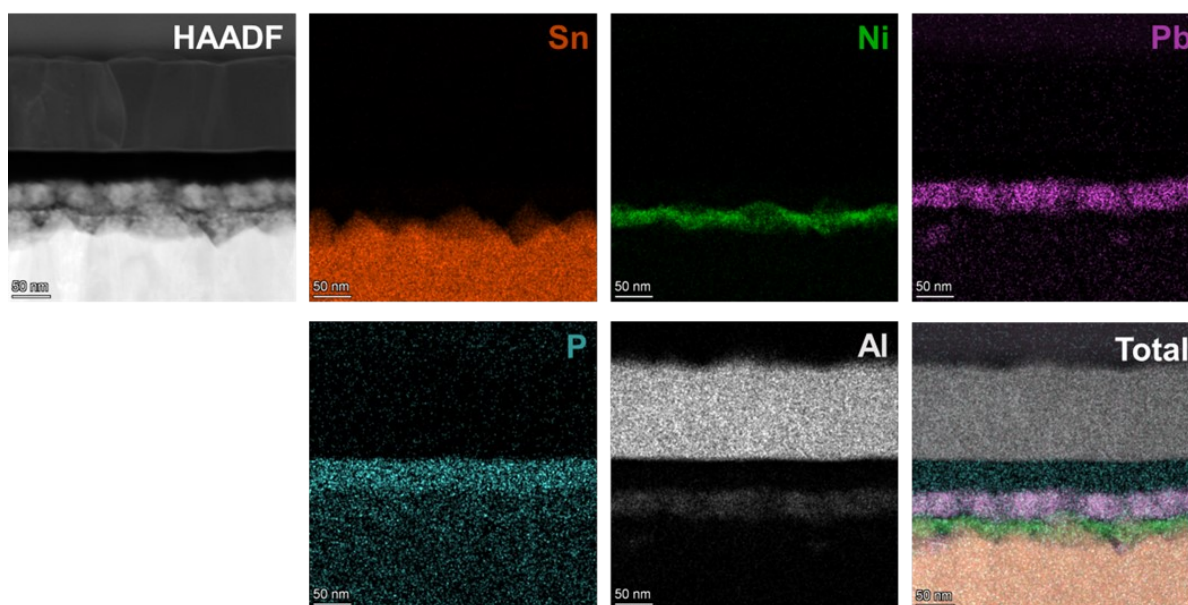

100

101

102 **Figure S13.** High-angle annular dark-field (HAADF) image and EDS spectra of the PeLED.  
103 Each layer is successfully deposited, as evidenced by the distinct elemental distributions.

104

105

106

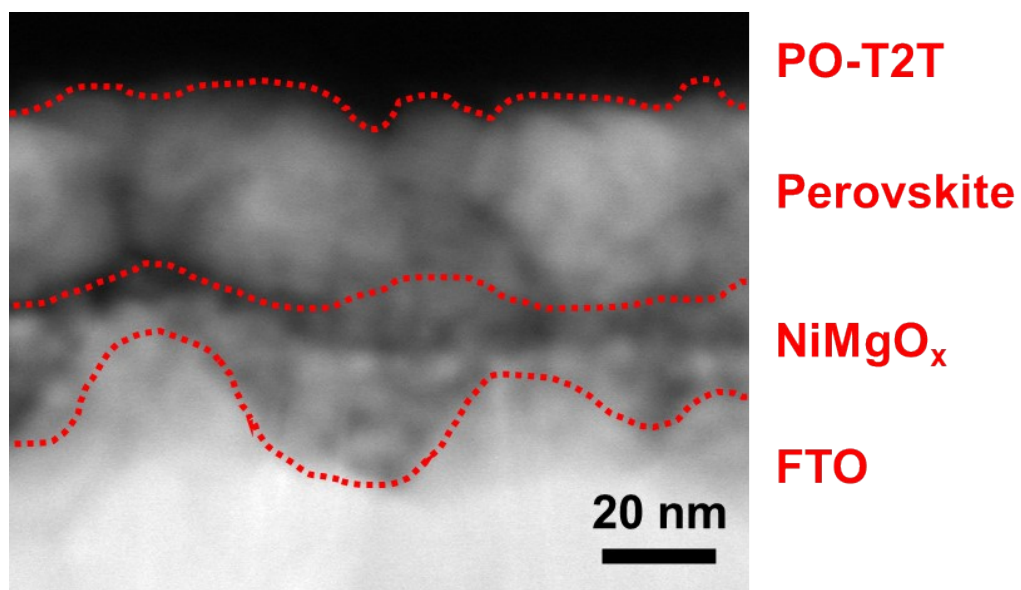

107

108

109 **Figure S14.** High-magnification cross-sectional STEM image of the PeLED, showing clearly  
110 distinguishable layers.

111

112

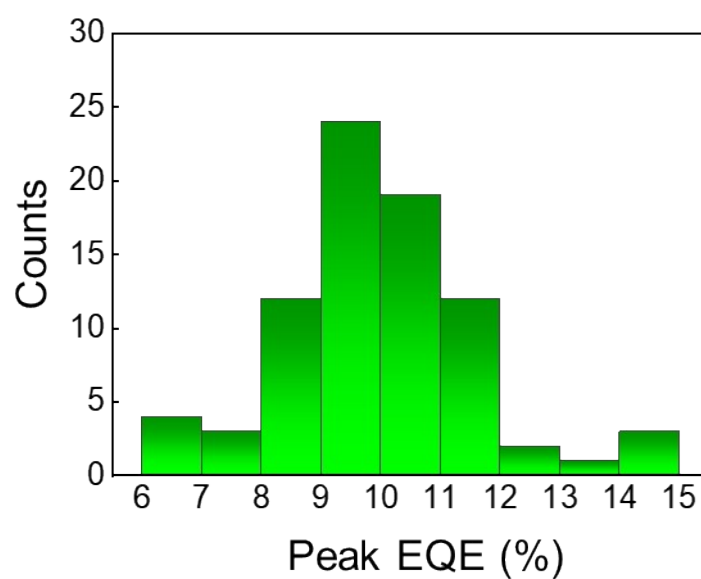

**Figure S15.** Histogram of peak EQE for 80 devices with the 4PADCB interlayer (FTO/NiMgO<sub>x</sub>/4PADCB/perovskite/PO-T2T/LiF/Al). The average EQE is 10.0%.



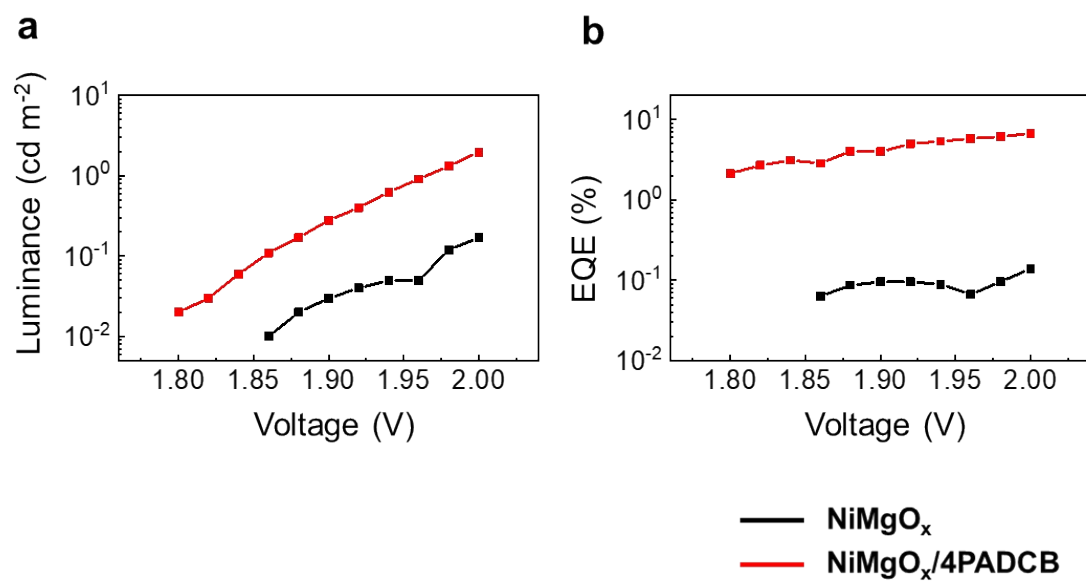

**Figure S16.** (a) Luminance and (b) EQE relationship at low operating voltage ( $\sim 2$  V) w/ and w/o 4PADCB interlayers.

127

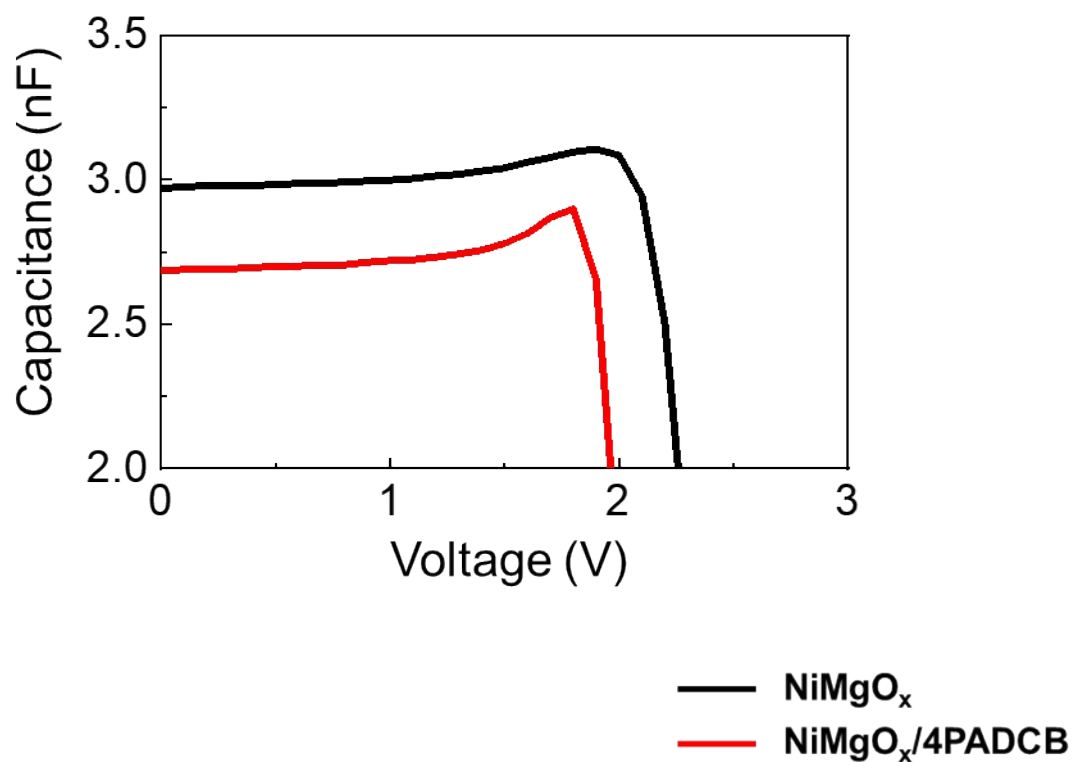

128

129

130 **Figure S17.** The capacitance-voltage (C-V) relationship of PeLED w/ and w/o 4PADCB  
131 interlayers.

132

133

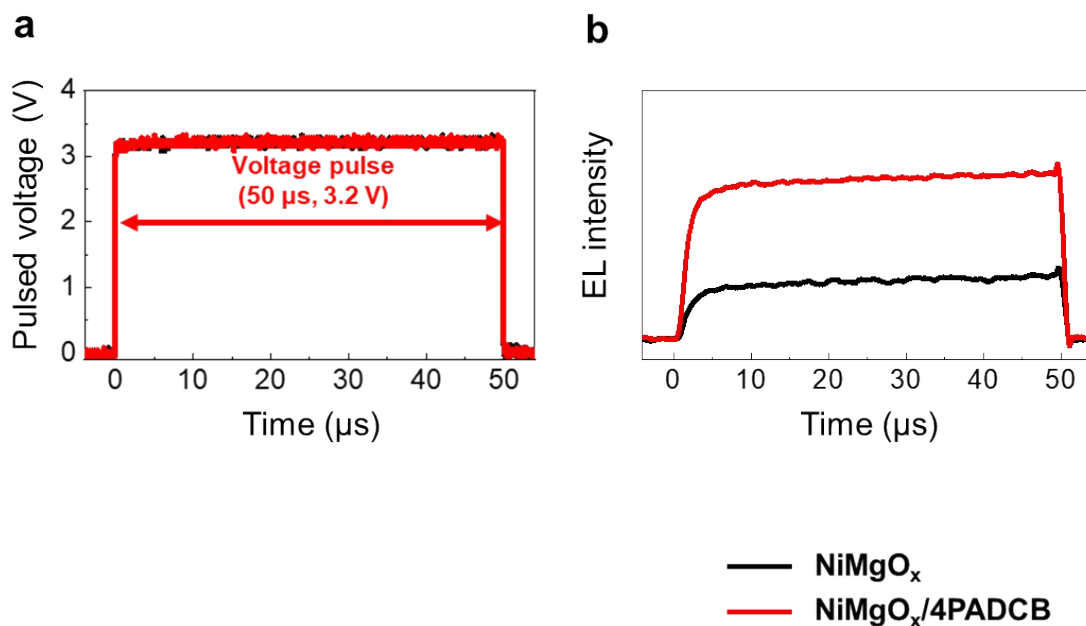

**Figure S18.** Pulsed voltage and time relationship during TrEL measurements. (a) the pulsed voltage was 3.2 V with 50 μs periods and (b) absolute transient EL (TrEL) spectra w/ and w/o the 4PADCB interlayer.

144

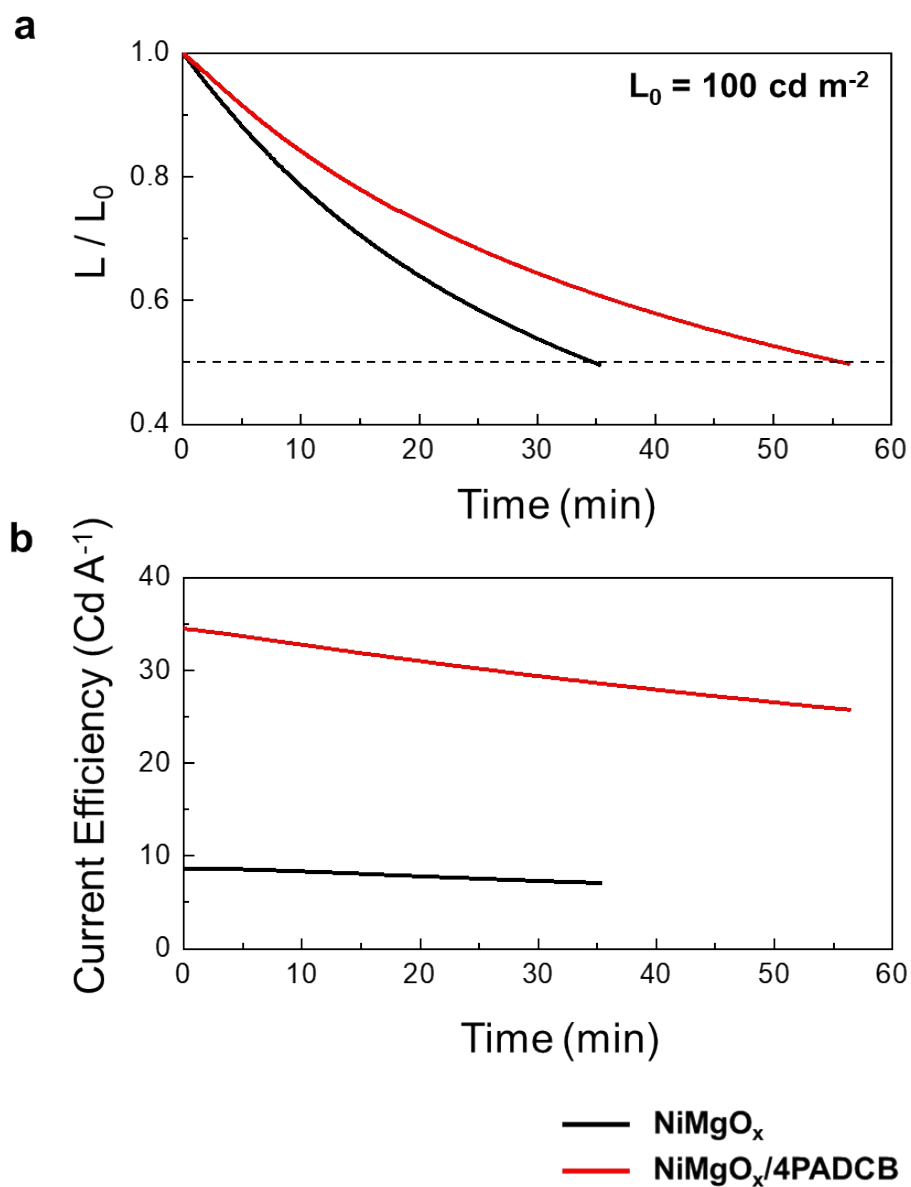

145

146

147 **Figure S19.** Device stability test with time variation. The results indicate (a) luminance-time  
 148 (L-t) relationship and (b) current efficiency-time (CE-t) relationship.

149

150

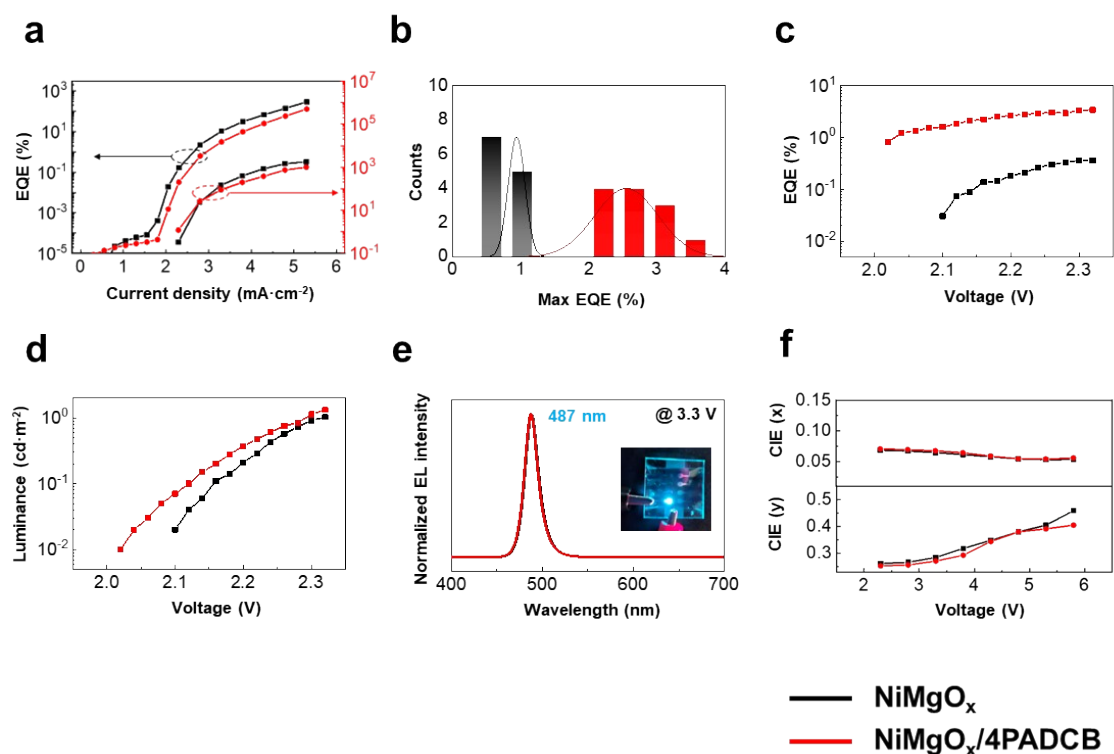

**Figure S20.** Sky-blue PeLED characterization w/ and w/o 4PADCB interlayer molecules. (a) J-V-L characteristics and (b) derivation of maximum EQE. (c) EQE and (d) luminance curves in the sub-bandgap voltage region (~2.3 V) for each device. (e) Normalized electroluminescence (EL) spectra at a 3.3 V bias and demonstration image of sky-blue PeLEDs with and without 4PADCB interlayers. (f) Color stability evaluated by CIE coordinate shift under bias.

|                                                                | $\lambda_{\text{PL}}$<br>(nm) | $A_1$ | $\tau_1$<br>(ns) | $A_2$ | $\tau_2$<br>(ns) | $A_3$ | $\tau_3$<br>(ns) | $\tau_{\text{avg}}$<br>(ns) | $R^2$ |
|----------------------------------------------------------------|-------------------------------|-------|------------------|-------|------------------|-------|------------------|-----------------------------|-------|
| On $\text{Ni}_{0.9}\text{Mg}_{0.1}\text{O}_x$                  | 521                           | 0.587 | 4.18             | 0.374 | 19.52            | 0.07  | 92.32            | 46.2                        | 0.999 |
| On<br>$\text{Ni}_{0.9}\text{Mg}_{0.1}\text{O}_x/4\text{PADCB}$ | 521                           | 0.550 | 4.23             | 0.375 | 23.99            | 0.081 | 137.5            | 77.9                        | 0.999 |

**Table S1.** Fitting parameter summary of TrPL curves. TrPL fitting was performed using tri-exponential decay curve which composed fast-decay ( $A_1$ ,  $\tau_1$ ), moderate-decay ( $A_2$ ,  $\tau_2$ ) and slow-decay ( $A_3$ ,  $\tau_3$ ). The fast-decay component is related to non-radiative recombination by trap state, whereas moderate and slow decay are related to radiative recombination, respectively. The average PL lifetime ( $\tau_{\text{avg}}$ ) is calculated from formula

$$\tau_{\text{avg}} = \frac{A_1\tau_1^2 + A_2\tau_2^2 + A_3\tau_3^2}{A_1\tau_1 + A_2\tau_2 + A_3\tau_3}.$$

173

|                                                          | $\lambda_{\text{EL}}$<br>(nm) | $V_{\text{on}}$ at 1 $\text{cd m}^{-2}$<br>(V) | $L_{\text{max}}$ ( $\text{cd m}^{-2}$ )<br>(at bias (V)) | $\text{EQE}_{\text{max}}$ (%)<br>(at bias (V)) | $\text{CE}_{\text{max}}$ ( $\text{cd A}^{-1}$ )<br>(at bias (V)) | $\text{PE}_{\text{max}}$ ( $\text{lm W}^{-1}$ )<br>(at bias (V)) |
|----------------------------------------------------------|-------------------------------|------------------------------------------------|----------------------------------------------------------|------------------------------------------------|------------------------------------------------------------------|------------------------------------------------------------------|
| $\text{Ni}_{0.9}\text{Mg}_{0.1}\text{O}_x$               | 521                           | 2.12                                           | 22,634<br>(4.8)                                          | 5.51<br>(3.8)                                  | 20.51<br>(3.8)                                                   | 16.96<br>(3.8)                                                   |
| $\text{Ni}_{0.9}\text{Mg}_{0.1}\text{O}_x/4\text{PACz}$  | 521                           | 2.06                                           | 29,822<br>(4.8)                                          | 6.76<br>(3.8)                                  | 24.99<br>(3.8)                                                   | 20.88<br>(3.3)                                                   |
| $\text{Ni}_{0.9}\text{Mg}_{0.1}\text{O}_x/4\text{PADCB}$ | 521                           | 1.96                                           | 38,557<br>(5.3)                                          | 14.38<br>(3.3)                                 | 53.61<br>(3.3)                                                   | 59.81<br>(2.8)                                                   |
| $\text{Ni}_{0.9}\text{Mg}_{0.1}\text{O}_x$               | 487                           | 2.32                                           | 1,748<br>(5.3)                                           | 1.07<br>(3.3)                                  | 1.38<br>(3.3)                                                    | 1.31<br>(3.3)                                                    |
| $\text{Ni}_{0.9}\text{Mg}_{0.1}\text{O}_x/4\text{PADCB}$ | 487                           | 2.29                                           | 1,049<br>(5.3)                                           | 3.31<br>(2.8)                                  | 4.00<br>(2.8)                                                    | 4.94<br>(2.3)                                                    |

174

175

176 **Table S2.** Summarized PeLED characteristics with and without SAM interlayers on  $\text{NiMgO}_x$ .
